# Supplementary material for: Health-Related Quality of Life, Depression and Anxiety in Hospitalized Patients with Tuberculosis
Source: PubMed Central journal article supplement — Tuberc Respir Dis (Seoul). 2016 Dec 30;80(1):69–76. doi: 10.4046/trd.2017.80.1.69 (PMC5256348; doi:10.4046/trd.2017.80.1.69), 2016-12-30
Supplement: trd-80-69-s001.pdf [file trd-80-69-s001.pdf]

**Supplementary Table S1.** Descriptive measures of the standardized scores for the eight domains of the 36-item Short Form and for the two summary measures (physical and mental component) of the Brazilian male population by age groups

| Age group                    | PH        | RF        | BP        | GH        | VT        | SF        | RE        | MH        | Physical  | Mental    |
|------------------------------|-----------|-----------|-----------|-----------|-----------|-----------|-----------|-----------|-----------|-----------|
| Up to 24 years old (n = 645) |           |           |           |           |           |           |           |           |           |           |
| Mean                         | 95.3      | 89.8      | 90.6      | 83.7      | 80.4      | 93.1      | 90        | 80.9      | 56.6      | 53.4      |
| 95% CI                       | 93.1–97.5 | 87.0–92.6 | 88.3–92.8 | 81.5–85.9 | 77.8–83.1 | 91.1–95.1 | 87.0–93.0 | 78.6–83.2 | 55.9–57.2 | 52.2–54.6 |
| % Ground                     | 1.9       | 0.0       | 0.0       | 0.0       | 0.0       | 0.0       | 1.9       | 0.0       | 0.0       | 0.0       |
| % Ceiling                    | 85.4      | 70.1      | 66.0      | 14.6      | 25.8      | 78.0      | 76.9      | 22.5      | 49        | 14.4      |
| 25–34 years old (n = 2,100)  |           |           |           |           |           |           |           |           |           |           |
| Mean                         | 92.0      | 90.6      | 89.8      | 83.2      | 81.3      | 92.8      | 90.0      | 82.1      | 55.7      | 54.4      |
| 95% CI                       | 90.6–93.5 | 89.2–92.0 | 88.5–91.1 | 82.1–84.3 | 80.2–82.4 | 91.7–93.8 | 87.0–93.0 | 81.0–83.2 | 55.2–56.1 | 53.8–54.9 |
| % Ground                     | 2.2       | 1.2       | 0.8       | 0.0       | 0.1       | 0.4       | 1.2       | 0.0       | 0.0       | 0.1       |
| % Ceiling                    | 78.2      | 76.3      | 69.2      | 14.2      | 19.2      | 77        | 78.8      | 21.4      | 50.7      | 12.4      |
| 35–44 years old (n = 2,685)  |           |           |           |           |           |           |           |           |           |           |
| Mean                         | 86.5      | 87.1      | 85.4      | 77.7      | 78.6      | 91.5      | 89.9      | 79.8      | 53.4      | 53.9      |
| 95% CI                       | 84.9–88.1 | 85.8–88.5 | 84.1–86.7 | 76.5–78.9 | 77.6–79.7 | 90.5–92.5 | 88.7–91.1 | 78.8–80.8 | 52.8–53.9 | 53.4–54.4 |
| % Ground                     | 4         | 2.3       | 0.6       | 0.1       | 0.0       | 0.4       | 1.4       | 0.1       | 0.9       | 0.6       |
| % Ceiling                    | 67.2      | 67.8      | 58.4      | 8.0       | 17.4      | 72.2      | 73.8      | 18.1      | 37.7      | 11.9      |
| 45–54 years old (n = 2,555)  |           |           |           |           |           |           |           |           |           |           |
| Mean                         | 80.8      | 82.4      | 80.5      | 72.1      | 75.4      | 86.4      | 86.0      | 77.4      | 51.0      | 52.5      |
| 95% CI                       | 79.1–82.6 | 80.8–84.0 | 79.0–82.1 | 70.7–73.4 | 74.2–76.6 | 85.1–87.8 | 84.5–87.5 | 76.2–78.7 | 50.4–51.6 | 51.9–53.1 |
| % Ground                     | 4.0       | 2.6       | 1.5       | 0.3       | 0.0       | 0.6       | 2.3       | 0.1       | 0.7       | 0.3       |
| % Ceiling                    | 52.3      | 60.4      | 49.4      | 5.0       | 17.1      | 63.1      | 67.4      | 17.4      | 29.0      | 16.2      |
| 55–64 years old (n = 2,120)  |           |           |           |           |           |           |           |           |           |           |
| Mean                         | 74.3      | 75.9      | 76.8      | 67.2      | 74.0      | 84.3      | 81.2      | 77.1      | 48.3      | 52.2      |
| 95% CI                       | 72.2–76.3 | 73.8–78.0 | 75.0–78.6 | 65.5–68.8 | 72.5–75.4 | 82.7–85.8 | 79.3–83.1 | 75.7–78.5 | 47.6–49.0 | 51.4–52.9 |
| % Ground                     | 3.8       | 4.5       | 1.4       | 1.0       | 0.5       | 0.8       | 2.9       | 0.5       | 1.2       | 0.6       |
| % Ceiling                    | 39        | 52.6      | 41.3      | 3.9       | 17.2      | 59.3      | 60.2      | 19.1      | 19.1      | 15.9      |
| 65–74 years old (n = 1,565)  |           |           |           |           |           |           |           |           |           |           |
| Mean                         | 64.1      | 67.8      | 73.6      | 62.2      | 70.1      | 79.5      | 75.8      | 74.9      | 45.1      | 51.0      |

|                          |           |           |           |           |           |           |           |           |           |           |
|--------------------------|-----------|-----------|-----------|-----------|-----------|-----------|-----------|-----------|-----------|-----------|
| 95%CI                    | 61.7–66.6 | 65.2–70.3 | 71.4–75.8 | 60.4–64.0 | 68.4–71.9 | 77.4–81.5 | 73.5–78.2 | 73.3–76.5 | 44.2–45.9 | 50.1–51.9 |
| % Ground                 | 4.8       | 6.0       | 1.5       | 0.9       | 0.3       | 0.9       | 4.6       | 0.0       | 0.6       | 0.6       |
| % Ceiling                | 20.1      | 38.4      | 39.8      | 2.1       | 13.4      | 50.9      | 50.3      | 14.0      | 12.0      | 16.7      |
| ≥ 75 years old (n = 754) |           |           |           |           |           |           |           |           |           |           |
| Mean                     | 48.0      | 56.0      | 67.6      | 56.5      | 68.0      | 73.8      | 68.3      | 76.8      | 39.5      | 51.5      |
| 95% CI                   | 44.5–51.5 | 52.2–59.8 | 64.4–70.9 | 53.9–59.1 | 65.5–70.5 | 70.8–76.8 | 64.7–72.0 | 74.7–79.0 | 38.3–40.7 | 50.3–52.8 |
| % Ground                 | 9.3       | 10.2      | 2.7       | 1.5       | 0.3       | 0.6       | 6.3       | 0.0       | 5.1       | 0.6       |
| % Ceiling                | 9.0       | 28.8      | 31.0      | 1.5       | 12.1      | 39.9      | 41.7      | 20.2      | 5.7       | 19.3      |
| Total (n = 12,423)       |           |           |           |           |           |           |           |           |           |           |
| Mean                     | 79.4      | 80.7      | 81.4      | 72.7      | 76.0      | 86.9      | 84.8      | 78.5      | 50.7      | 52.9      |
| 95% CI                   | 78.6–80.3 | 79.9–81.4 | 80.7–82.1 | 72.1–73.4 | 75.4–76.6 | 86.3–87.5 | 84.1–85.5 | 78.0–79.0 | 50.4–51.0 | 52.6–53.1 |
| % Ground                 | 4         | 3.4       | 1.2       | 0.5       | 0.2       | 0.6       | 2.5       | 0.1       | 0.9       | 0.4       |
| % Ceiling                | 52.6      | 59.2      | 51.9      | 6.9       | 17.1      | 64.6      | 66.3      | 18.5      | 30.3      | 14.7      |

PH: physical functioning; RF: role-physical; GH: general health; VT: vitality; SF: social functioning; AE: role-emotional; RE: role-emotional; MH: mental health; CI: confidence interval.

Source: Adapted from Laguardia J et al. Rev Bras Epidemiol 2013;16:889-97 according to Creative Commons license.
