# Supplementary material for: Health-Related Quality of Life, Depression and Anxiety in Hospitalized Patients with Tuberculosis
Source: PubMed Central journal article supplement — Tuberc Respir Dis (Seoul). 2016 Dec 30;80(1):69–76. doi: 10.4046/trd.2017.80.1.69 (PMC5256348; doi:10.4046/trd.2017.80.1.69), 2016-12-30
Supplement: trd-80-69-s002.pdf [file trd-80-69-s002.pdf]

|                           |           |           |           |           |           |           |           |           |           |           |
|---------------------------|-----------|-----------|-----------|-----------|-----------|-----------|-----------|-----------|-----------|-----------|
| Mean                      | 54.0      | 63.2      | 64.7      | 59.7      | 65.1      | 74.6      | 71.2      | 72.0      | 41.8      | 49.7      |
| 95% CI                    | 51.9–56.2 | 61.0–65.3 | 62.7–66.6 | 58.0–61.3 | 63.5–66.6 | 72.8–76.3 | 69.1–73.2 | 70.5–73.5 | 41.1–42.6 | 48.9–50.5 |
| % Ground                  | 6.1       | 8.1       | 2.8       | 1.8       | 1.2       | 1.3       | 5.0       | 0.1       | 2.4       | 0.9       |
| % Ceiling                 | 13.9      | 31.7      | 24.9      | 1.5       | 9.1       | 39.6      | 42.5      | 14.7      | 6.3       | 14.4      |
| ≥ 75 years old<br>(n=754) |           |           |           |           |           |           |           |           |           |           |
| Mean                      | 43.3      | 53.0      | 61.9      | 55.3      | 62.1      | 68.6      | 65.6      | 70.3      | 38.3      | 48.7      |
| 95%CI                     | 40.0–46.6 | 49.6–56.4 | 59.0–64.9 | 52.7–57.8 | 59.7–64.5 | 65.7–71.6 | 62.3–68.9 | 68.0–72.6 | 37.2–39.5 | 47.4–50.0 |
| % Ground                  | 12.4      | 14.0      | 3.6       | 2.1       | 1.7       | 2.9       | 7.8       | 1.4       | 3.6       | 1.9       |
| % Ceiling                 | 9.3       | 24.5      | 24.3      | 2.9       | 11.8      | 35.9      | 39.9      | 16.2      | 4.8       | 19.7      |
| Total<br>(n=12,423)       |           |           |           |           |           |           |           |           |           |           |
| Mean                      | 72.5      | 75.2      | 73.4      | 68.3      | 68.9      | 81.7      | 79.5      | 71.6      | 48.3      | 49.7      |
| 95%CI                     | 71.8–73.3 | 74.5–75.9 | 72.7–74.0 | 67.8–68.9 | 68.3–69.4 | 81.1–82.3 | 78.8–80.1 | 71.1–72.1 | 48.1–48.6 | 49.5–50   |
| % Ground                  | 3.9       | 4.1       | 1.6       | 0.8       | 0.6       | 0.8       | 3.5       | 0.3       | 1.1       | 1.2       |
| % Ceiling                 | 39.3      | 49.1      | 37.1      | 4.5       | 10.7      | 54.1      | 56.4      | 12.2      | 22.1      | 11.4      |

PH: physical functioning; RF: role-physical; GH: general health; VT: vitality; SF: social functioning; RE: role-emotional; MH: mental health; physical: physical

component summary; mental: mental component summary; CI: confidence interval.

Source: Adapted from Laguardia J et al. Rev Bras Epidemiol 2013;16:889-97 according to Creative Commons license.
